# Supplementary material for: Gas-phase preparation and the stability of superatomic Nb11O15−
Source: Royal Society of Chemistry journal article supplement (doi:10.1039/d1cp02128a), 2021-01-01
Supplement: d1cp02128a1.pdf [file d1cp02128a1.pdf]

## ***Supporting Information for***

### **Gas-Phase Preparation and the Stability of Superatomic Nb<sub>11</sub>O<sub>15</sub><sup>-</sup>**

Xin Lei,<sup>a,§</sup> Hanyu Zhang,<sup>a,§</sup> Yuhan Jia,<sup>a,b,§</sup> and Zhixun Luo<sup>a,b,\*</sup>

<sup>a</sup>State Key Laboratory for Structural Chemistry of Unstable and Stable Species, Institute of Chemistry, Chinese Academy of Sciences, Beijing 100190, China.

<sup>b</sup>University of Chinese Academy of Sciences, Beijing 100049, China.

\*Corresponding author. E-mail: [zxluo@iccas.ac.cn](mailto:zxluo@iccas.ac.cn) (Z.L).

<sup>§</sup>These authors contributed equally to this work.

## **Contents**

|                                                                 |    |
|-----------------------------------------------------------------|----|
| S1. Experimental details .....                                  | 2  |
| S2. Reaction rate estimation .....                              | 4  |
| S3. Structure determination and energetics.....                 | 6  |
| S3.1 Nb <sub>n</sub> <sup>-</sup> Clusters.....                 | 6  |
| S3.2 Nb <sub>n</sub> O <sub>m</sub> <sup>-</sup> Clusters ..... | 7  |
| S3.3 The Nb <sub>11</sub> O <sub>15</sub> <sup>-</sup> .....    | 9  |
| S4. Wiberg bond order .....                                     | 10 |
| S5. Reaction channel and thermodynamics .....                   | 10 |
| S6. Molecular dynamics simulation .....                         | 11 |
| S7. Density of states and molecular orbitals .....              | 12 |
| S8. Energy decomposition analysis.....                          | 13 |
| References .....                                                | 14 |
| Appendix.....                                                   | 16 |

## S1. Experimental details

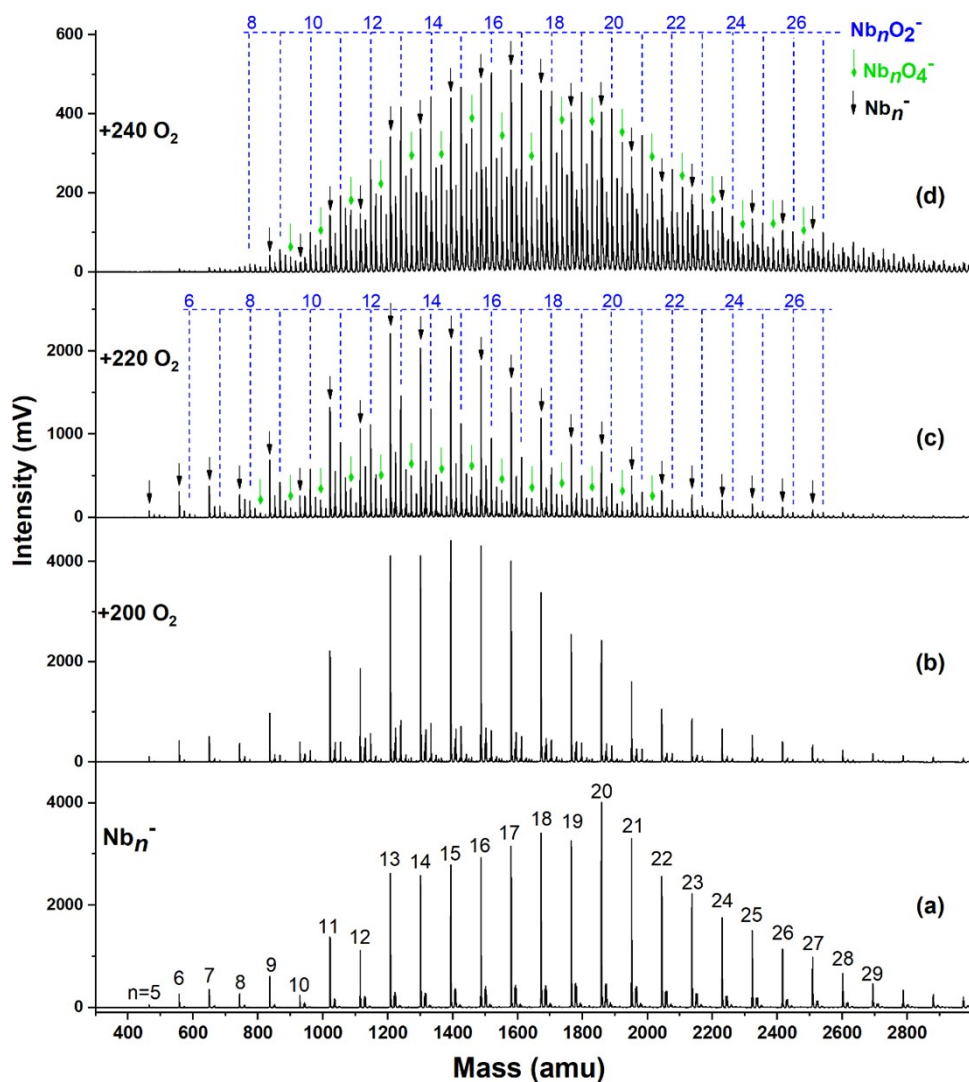

**Fig. S1** Mass spectra of the nascent  $\text{Nb}_n^-$  clusters (a) and in the presence of different flow rate of oxygen reactant (1%  $\text{O}_2$  in He) injected by a 10Hz pulse valve with the on-time per period at 200  $\mu\text{s}$  (b), 220  $\mu\text{s}$  (c), and 240  $\mu\text{s}$  (d) respectively. The peaks marked with black arrows refer to the pure  $\text{Nb}_n^-$  clusters, while the blue and green arrows correspond to the  $\text{Nb}_n\text{O}_2^-$  and  $\text{Nb}_n\text{O}_4^-$  products, respectively.

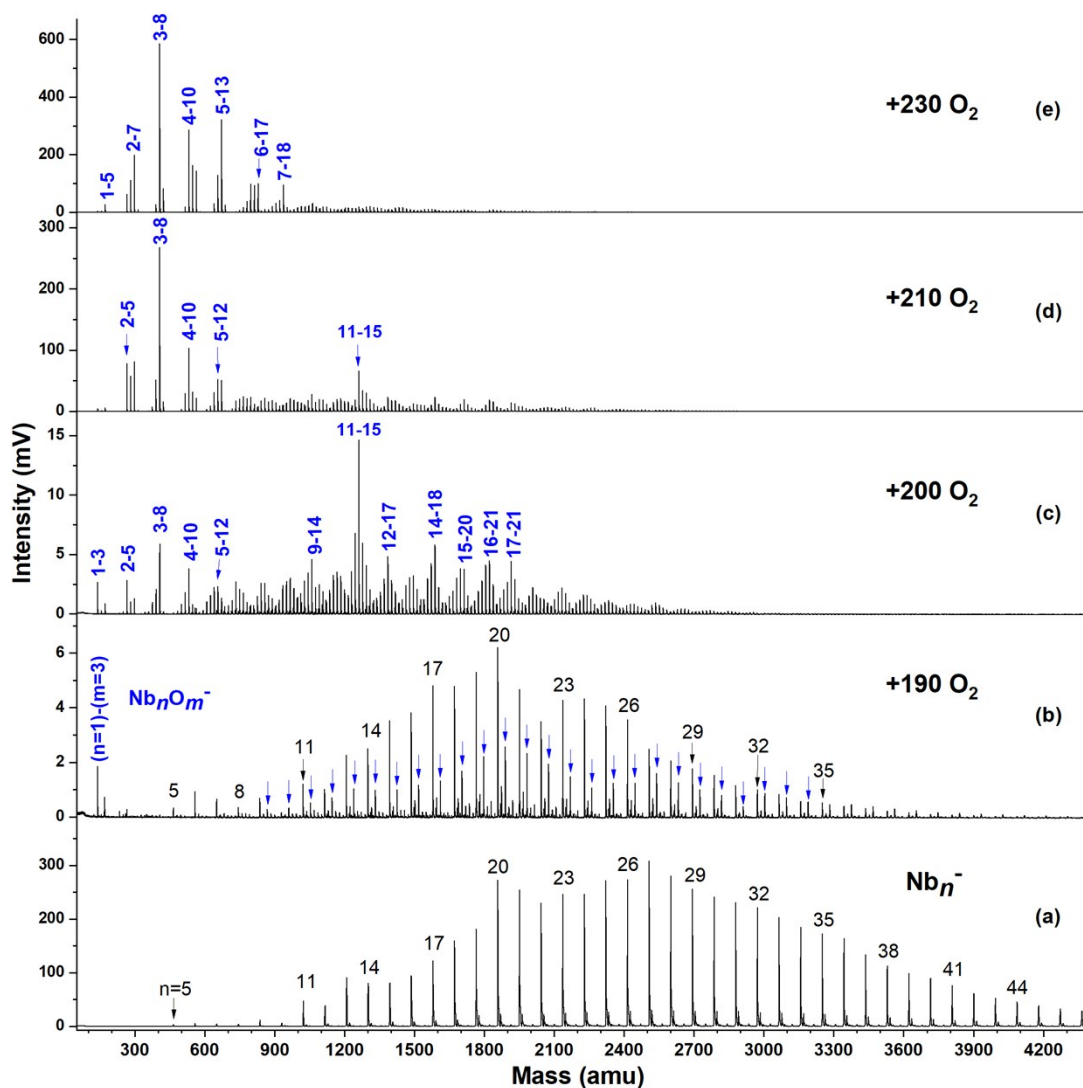

**Fig. S2** Mass spectra of the nascent Nb<sub>n</sub><sup>-</sup> clusters (a) and in the presence of different flow rate of oxygen reactant (20 % O<sub>2</sub> in He) injected by a 10 Hz pulse valve with the on-time per period at (b) 190 μs, (c) 200 μs, (d) 210 μs, (e) 230 μs respectively. The blue arrows referring to the Nb<sub>n</sub>O<sub>2</sub><sup>-</sup> clusters.

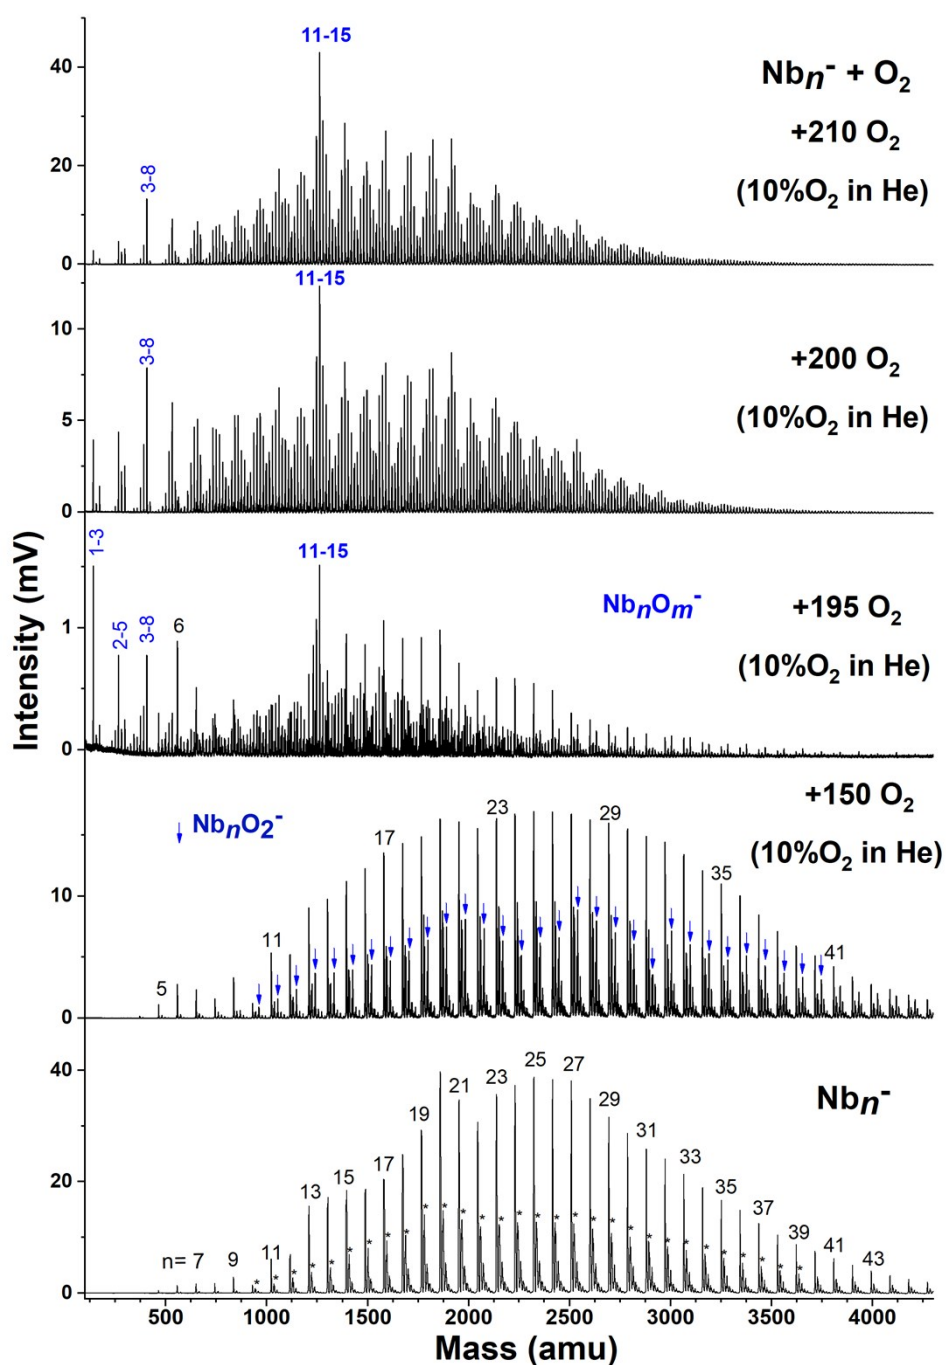

**Fig. S3** Repeated experiments showing the mass spectra of  $\text{Nb}_n^-$  clusters (a) and the products with 10%  $\text{O}_2$  in He, injected by a 10 Hz pulse valve with the on-time per period at (b) 150  $\mu\text{s}$ , (c) 195  $\mu\text{s}$ , (d) 200  $\mu\text{s}$ , (e) 210  $\mu\text{s}$  respectively, with the blue arrows referring to the  $\text{Nb}_n \text{O}_2^-$  clusters.

## S2. Reaction rate estimation

Considering that the small concentration of oxygen react with the niobium clusters to produce oxygen-addition products, we have estimated the reaction rate constants by assuming the initial reactions within a pseudo-first-order reaction, for which the rate constants  $k$  can be estimated by the following equation,<sup>1-4</sup>

$$\ln(I_A/I_0) = -k \cdot p \cdot \Delta t / (k_B \cdot T) \quad (1)$$

in which the variable  $I_A$  stands for the parent ion intensity at a certain  $O_2$  gas pressure, and  $I_0$  refers to the total signal intensity including both the reactant cluster ion intensity and the product ion intensity. The  $p$  refers to the effective pressure of the reactant gas calculated from the molecular density of the reactant gas. The  $k_B$  is the Boltzmann constant,  $T$  the temperature of the reactant gas, and  $\Delta t$  the effective reaction time in the flow tube reactor ( $\sim 60 \mu s$ )<sup>5</sup>. The effective pressure  $p$  is calculated with the ideal gas law  $P = \rho \cdot k_B \cdot T$ .  $\rho$  refers to the molecular density of the reactant gas, and is determined by  $\rho = N / (t \cdot U \cdot S)$ .  $N$  is the molecule number of reaction gas per pulse.  $t$  is the time sequence difference between the carrier gas.  $S$  is the cross-sectional areas defined by the inner diameters of the fast-flow reactor.  $U$  is the flowing velocity of cluster beam in the fast-flow reactor. The value of  $p$  is obtained by experimental calibration, and the details have been described elsewhere.<sup>6,7</sup>

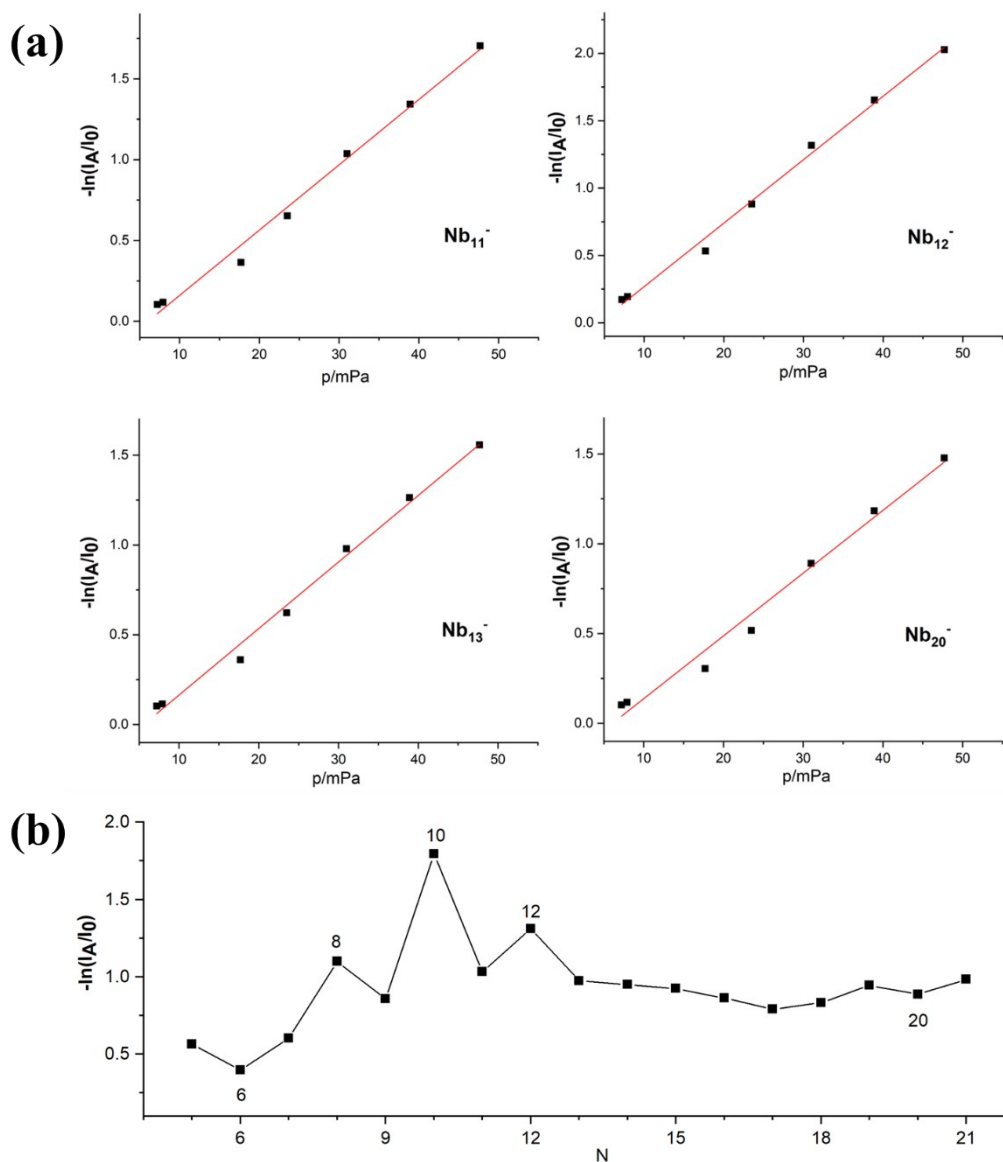

**Fig. S4 (a)** Linear fitting of  $-\ln(I_A/I_0)$  vs. partial pressures of  $O_2$  for  $Nb_{11-13}^-$  and  $Nb_{20}^-$ ; **(b)** Experimentally determined  $-\ln(I_A/I_0)$  for the reactions between  $Nb_n^-$  ( $n = 5-21$ ) and  $O_2$  with 1%  $O_2$  in He injection by a 10Hz pulse valve with the on-time per period at  $220\mu s$ . A good linear correlation between  $-\ln(I_A/I_0)$  and the partial pressures of  $O_2$  is obtained as is shown in (a) for the randomly drawing  $Nb_{11-13}^-$  and  $Nb_{20}^-$  clusters, implying the incipient reactions between the  $Nb_n^-$  clusters and  $O_2$  in the flow tube follow a pseudo-first-order mechanism. For  $Nb_n^-$ ,  $n = 7-13$ , the pseudo-first-order rate constants (in proportion to  $-\ln(I_A/I_0)$ ) for  $Nb_n^-$  with  $O_2$  follow the even/odd effect, as shown in (b).

### S3. Structure determination and energetics

#### S3.1 Nb<sub>n</sub><sup>-</sup> Clusters

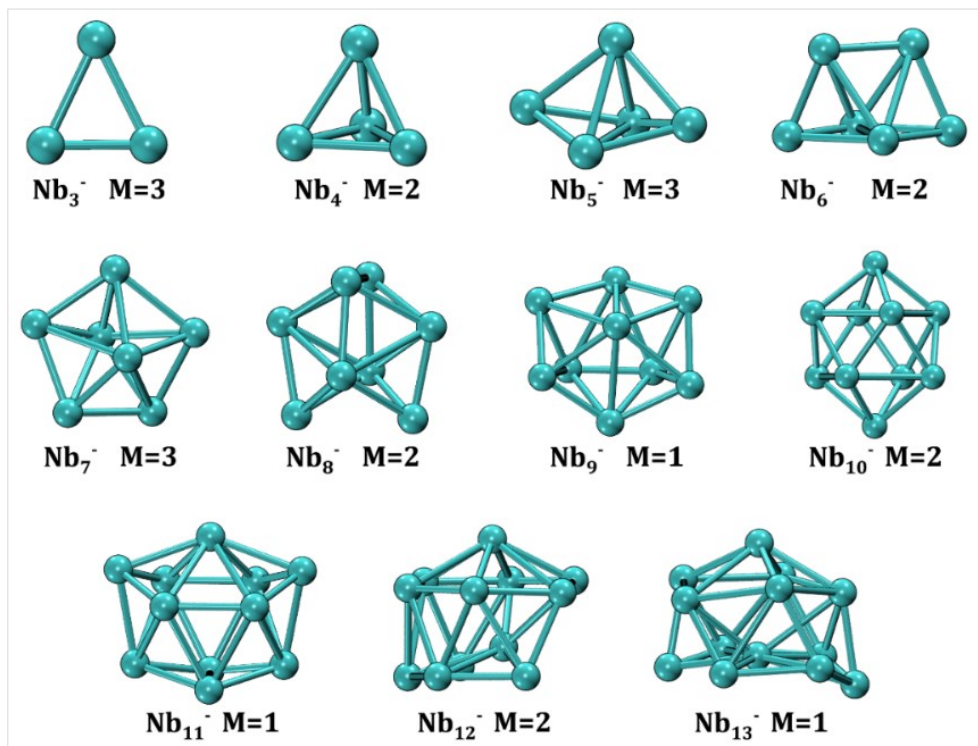

**Fig. S5** The optimized structures of anionic Nb<sub>n</sub><sup>-</sup> (n=3-13) at B3LYP/def2-TZVP level. M indicates spin multiplicity.

**Table S1.** VDEs and HOMO-LUMO gaps of the Nb<sub>n</sub><sup>-</sup> clusters from Kietzmann work.<sup>8</sup>

| n         | 5     | 6     | 7     | 8     | 9     | 10    | 11    | 12    | 13    |
|-----------|-------|-------|-------|-------|-------|-------|-------|-------|-------|
| VDEs (eV) | 1.519 | 1.577 | 1.649 | 1.458 | 1.649 | 1.456 | 1.689 | 1.624 | 1.700 |
| Gaps (eV) | ----- | 0.231 | ----- | 0.704 | 0.001 | 0.503 | ----- | 0.201 | 0.002 |

### S3.2 $\text{Nb}_n\text{O}_m^-$ Clusters

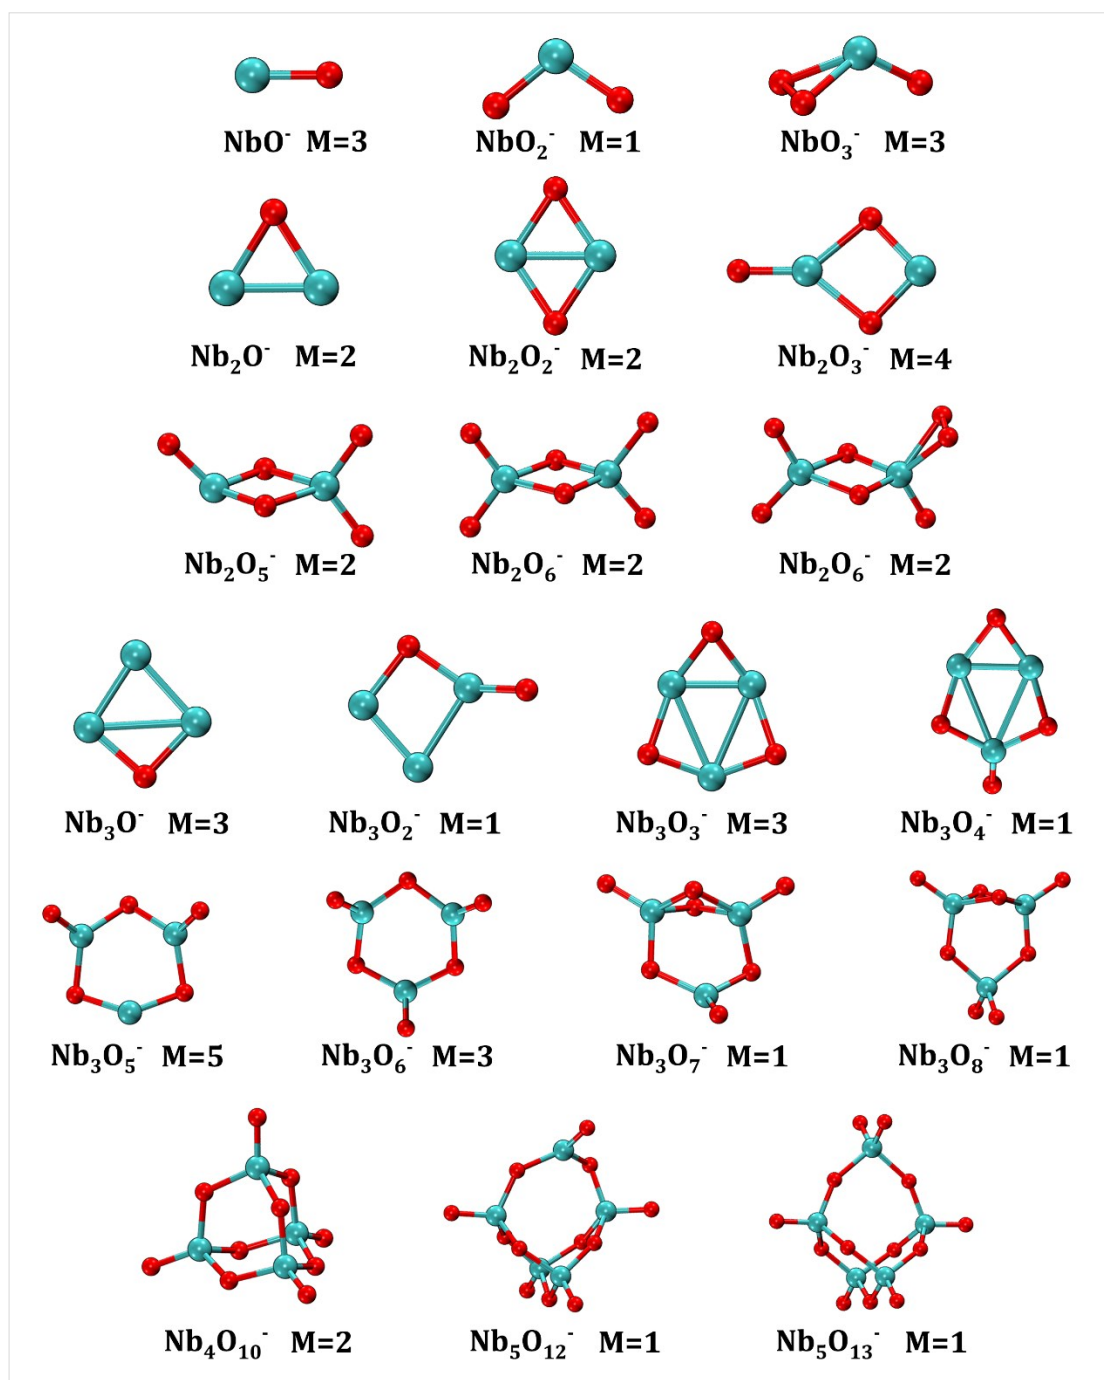

**Fig. S6** The optimized structures of anionic  $\text{Nb}_n\text{O}_m^-$  at B3LYP/def2-TZVP level. M indicates spin multiplicity.



**Table S2** The HOMO-LUMO gaps and electron detachment energies of the  $\text{Nb}_n\text{O}_m^-$  clusters calculated at B3LYP/def2-TZVP level of theory.

|                                 | Spin multiplicity | $\alpha$ gap (eV) | $\beta$ gap (eV) | VDE (eV)             |
|---------------------------------|-------------------|-------------------|------------------|----------------------|
| $\text{Nb}_1\text{O}_1^-$       | 3                 | 2.56              | 2.51             | 1.79                 |
| $\text{Nb}_1\text{O}_2^-$       | 1                 | 2.23              | -                | 1.72                 |
| $\text{Nb}_1\text{O}_3^-$       | 3                 | 2.51              | 3.95             | 2.00                 |
| $\text{Nb}_2\text{O}_1^-$       | 2                 | 0.48              | 1.66             | 0.39                 |
| $\text{Nb}_2\text{O}_2^-$       | 2                 | 1.96              | 2.2              | 1.09                 |
| $\text{Nb}_2\text{O}_3^-$       | 4                 | 2.05              | 2.38             | 1.79                 |
| $\text{Nb}_2\text{O}_5^-$       | 2                 | 3.05              | 4.35             | 3.76                 |
| $\text{Nb}_2\text{O}_6^-$       | 2                 | 4.71              | 1.35             | 5.49                 |
| $\text{Nb}_2\text{O}_7^-$       | 2                 | 4.56              | 2.21             | 5.41                 |
| $\text{Nb}_3\text{O}^-$         | 3                 | 1.14              | 1.9              | 1.75                 |
| $\text{Nb}_3\text{O}_2^-$       | 1                 | 1.48              | -                | 1.76                 |
| $\text{Nb}_3\text{O}_3^-$       | 3                 | 1.66              | 2.08             | 1.62                 |
| $\text{Nb}_3\text{O}_4^-$       | 1                 | 1.84              | -                | 2.05                 |
| $\text{Nb}_3\text{O}_5^-$       | 5                 | 2.42              | 3.21             | 2.5753               |
| $\text{Nb}_3\text{O}_6^-$       | 3                 | 2.47              | 3.19             | 3.08                 |
| $\text{Nb}_3\text{O}_7^-$       | 1                 | 2.55              | -                | 3.49                 |
| $\text{Nb}_3\text{O}_8^-$       | 1                 | 4.03              | -                | 5.80                 |
| $\text{Nb}_4\text{O}_{10}^-$    | 2                 | 1.52              | 5.55             | 3.12                 |
| $\text{Nb}_5\text{O}_{12}^-$    | 1                 | 2.52              | -                | 4.33                 |
| $\text{Nb}_5\text{O}_{13}^-$    | 1                 | 3.61              | -                | 6.18                 |
| $\text{Nb}_{11}\text{O}_{15}^-$ | 1                 | 1.48              | -                | 3.09<br>(ADE=2.77eV) |

### S3.3 The $\text{Nb}_{11}\text{O}_{15}^-$

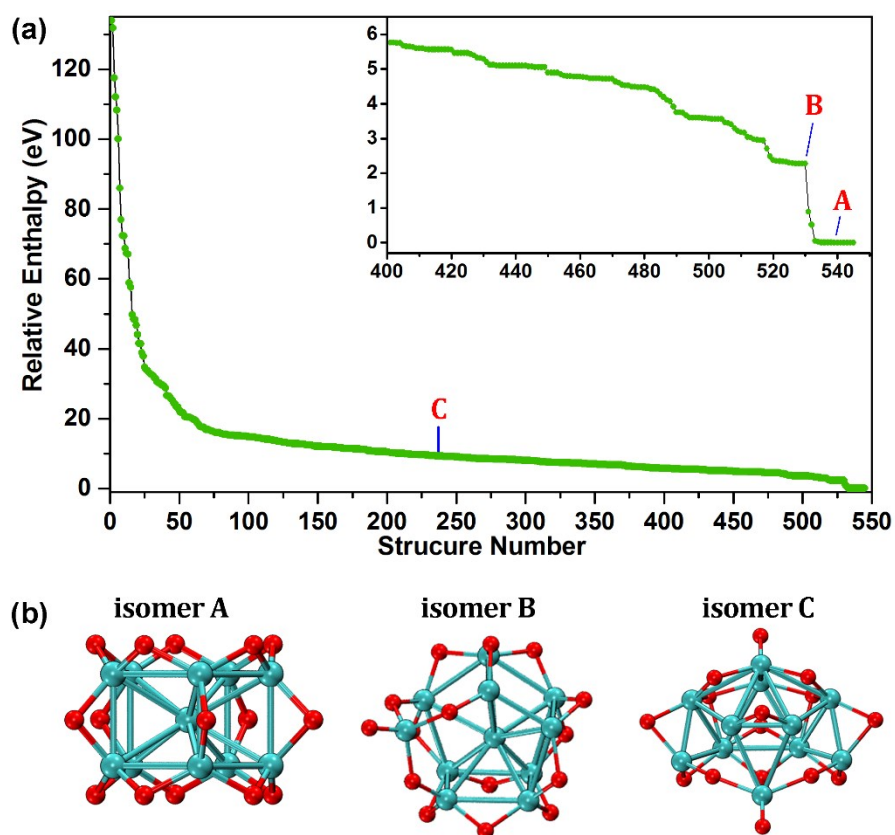

**Fig. S7** (a) The energy evolutionary simulation of the global minimum structures for neutral  $\text{Nb}_{11}\text{O}_{15}$  based on USPEX combined with VASP. (b) isomer structures with relative lower energies labeled in (a).

**Table S3.** Relative Energy (ZPVE, eV) of  $\text{Nb}_{11}\text{O}_{15}^-$  isomers.

| $\text{Nb}_{11}\text{O}_{15}^-$ | spin multiplicity | B3LYP/def2TZVP<br>$\Delta E$ (eV) | BPW91/def2TZVP<br>$\Delta E$ (eV) |
|---------------------------------|-------------------|-----------------------------------|-----------------------------------|
| A                               | 1                 | 0.00                              | 0.00                              |
|                                 | 3                 | 0.17                              | 0.12                              |
|                                 | 5                 | 0.16                              | \                                 |
| B                               | 1                 | 1.88                              | 2.08                              |
| C                               | 1                 | 9.45                              | 7.67                              |

## S4. Wiberg bond order

**Table S4** Natural atomic charges ( $q/|e|$ ), electronic configurations, and Wiberg bond orders of the central Nb atom, the 10 Nb-ligands and 15 O-bridges in  $Nb_{11}O_{15}^-$ , calculated at B3LYP/def2-TZVP level of theory using NBO6.0 method.

|                                               | Atoms                               | Atomic charges $q$ | Electronic Configurations                                                                          | Wiberg bond order indexes |
|-----------------------------------------------|-------------------------------------|--------------------|----------------------------------------------------------------------------------------------------|---------------------------|
| $D_{5h}$<br>$Nb_{11}O_{15}^-$<br>( $^1A_1'$ ) | Nb <sub>1</sub>                     | -0.804             | [Kr]5s <sup>0.87</sup> 4d <sup>4.87</sup> 5p <sup>0.05</sup> 5d <sup>0.04</sup>                    | 6.33                      |
|                                               | Nb <sub>2-11</sub>                  | +1.368 ~ +1.367    | [Kr]5s <sup>0.36</sup> 4d <sup>3.23</sup> 5p <sup>0.03</sup> 4f <sup>0.01</sup> 5d <sup>0.05</sup> | 3.77                      |
|                                               | Nb <sub>1</sub> -Nb <sub>2-11</sub> | -----              | -----                                                                                              | 0.60                      |
|                                               | O <sub>1-10</sub>                   | -0.920             | [He]2s <sup>1.80</sup> 2p <sup>5.10</sup> 3s <sup>0.01</sup> 3p <sup>0.01</sup> 3d <sup>0.01</sup> | 1.28                      |
|                                               | O <sub>11-15</sub>                  | -0.934             | [He]2s <sup>1.79</sup> 2p <sup>5.11</sup> 3s <sup>0.01</sup> 3p <sup>0.01</sup> 3d <sup>0.01</sup> | 1.29                      |

## S5. Reaction channel and thermodynamics

**Table S5.** Proposed reaction channels, calculated at the B3LYP/def2-TZVP level of theory.

| Proposed reaction channels                                                                                     | Examples                                                       | $\Delta H$ (eV) |
|----------------------------------------------------------------------------------------------------------------|----------------------------------------------------------------|-----------------|
| (1) $Nb_n^- \xrightarrow{O_2} Nb_n O_2^- \xrightarrow{O_2} Nb_n O_4^-$                                         | $Nb_3^- + O_2 \rightarrow Nb_3 O_2^-$                          | -9.64           |
|                                                                                                                | $Nb_3 O_2^- + O_2 \rightarrow Nb_3 O_4^-$                      | -10.02          |
| (2) $Nb_n^- + O_2 \rightarrow Nb_n O^- + O^*$                                                                  | $Nb_3^- + O_2 \rightarrow Nb_3 O^- + O^*$                      | -2.68           |
| (3) $Nb_n^- + m O_2 \rightarrow Nb_{n-1} O_{2m-1}^- + NbO$                                                     | $Nb_3^- + O_2 \rightarrow Nb_2 O^- + NbO$                      | -4.64           |
| (4) $Nb_n^- + m O_2 \rightarrow Nb_{n-1} O_{2m-2}^- + NbO_2$                                                   | $Nb_3^- + 2 O_2 \rightarrow Nb_2 O_2^- + NbO_2$                | -11.78          |
| (5) $Nb_n^- + m O_2 \rightarrow Nb_{n-2} O_{2m-5}^- + Nb_2 O_5$                                                | $Nb_3^- + 3 O_2 \rightarrow NbO^- + Nb_2 O_5$                  | -22.75          |
| (6) $Nb_n^- + O_2 \rightarrow Nb_{n-1} O^- + NbO$                                                              | $Nb_3^- + O_2 \rightarrow Nb_2 O^- + NbO$                      | -4.64           |
| (7) $Nb_{n-1} O^- + O_2 \rightarrow Nb_{n-1} O_3^-$                                                            | $Nb_2 O^- + O_2 \rightarrow Nb_2 O_3^-$                        | -9.46           |
| (8) $Nb_{n-1} O_3^- + O_2 \rightarrow Nb_{n-1} O_5^-$                                                          | $Nb_2 O_3^- + O_2 \rightarrow Nb_2 O_5^-$                      | -10.29          |
| (9) $Nb_n^- + m O_2 \rightarrow Nb_{n-1} O_{2m-1} + NbO_1^-$                                                   | $Nb_3^- + O_2 \rightarrow Nb_2 O + NbO^-$                      | -6.08           |
| (10) $Nb_n^- + m O_2 \rightarrow Nb_{n-1} O_{2m-3} + NbO_3^-$                                                  | $Nb_3^- + 3 O_2 \rightarrow Nb_2 O_3 + NbO_3^-$                | -18.64          |
| (11) $NbO_3^- + NbO_2 \rightarrow Nb_2 O_5^-$                                                                  | $NbO_3^- + NbO_2 \rightarrow Nb_2 O_5^-$                       | -11.58          |
| (12) $NbO_3^- + Nb_2 O_5 \rightarrow Nb_3 O_8^-$                                                               | $NbO_3^- + Nb_2 O_5 \rightarrow Nb_3 O_8^-$                    | -11.26          |
| (13) $Nb_2 O_5^- + Nb_2 O_5 \rightarrow Nb_4 O_{10}^-$                                                         | $Nb_2 O_5^- + Nb_2 O_5 \rightarrow Nb_4 O_{10}^-$              | -7.79           |
| (14) $Nb_3 O_8^- + Nb_2 O_5 \rightarrow Nb_5 O_{13}^-$                                                         | $Nb_3 O_8^- + Nb_2 O_5 \rightarrow Nb_5 O_{13}^-$              | -6.69           |
| (15) $Nb_n^- + m O_2 \rightarrow Nb_{11} O_{15}^- + x NbO + y NbO_2 + z Nb_2 O_5$ (n=11+x+y+2z; 2m=15+x+2y+5z) | $Nb_{12}^- + 8 O_2 \rightarrow Nb_{11} O_{15}^- + NbO$         | <b>-77.64</b>   |
|                                                                                                                | $Nb_{13}^- + 9 O_2 \rightarrow Nb_{11} O_{15}^- + NbO + NbO_2$ | <b>-79.70</b>   |
|                                                                                                                | $Nb_{13}^- + 10 O_2 \rightarrow Nb_{11} O_{15}^- + Nb_2 O_5$   | <b>-93.94</b>   |

## S6. Molecular dynamics simulation

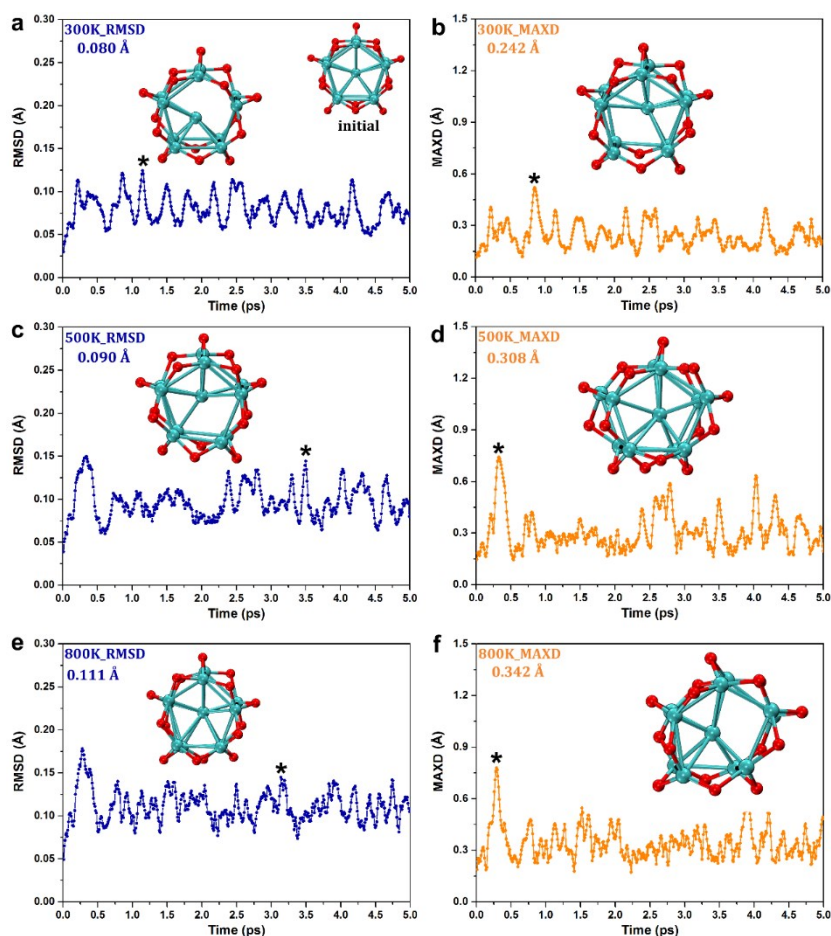

**Fig. S8** Born-Oppenheimer molecular dynamics simulations of  $D5h$   $Nb_{11}O_{15}^-$  at 300K, 500K, 800K for 5 ps, with the average root-mean-square-deviation (RMSD) values and maximum bond length deviation (MAXD) values indicated in Å.

## S7. Density of states and molecular orbitals

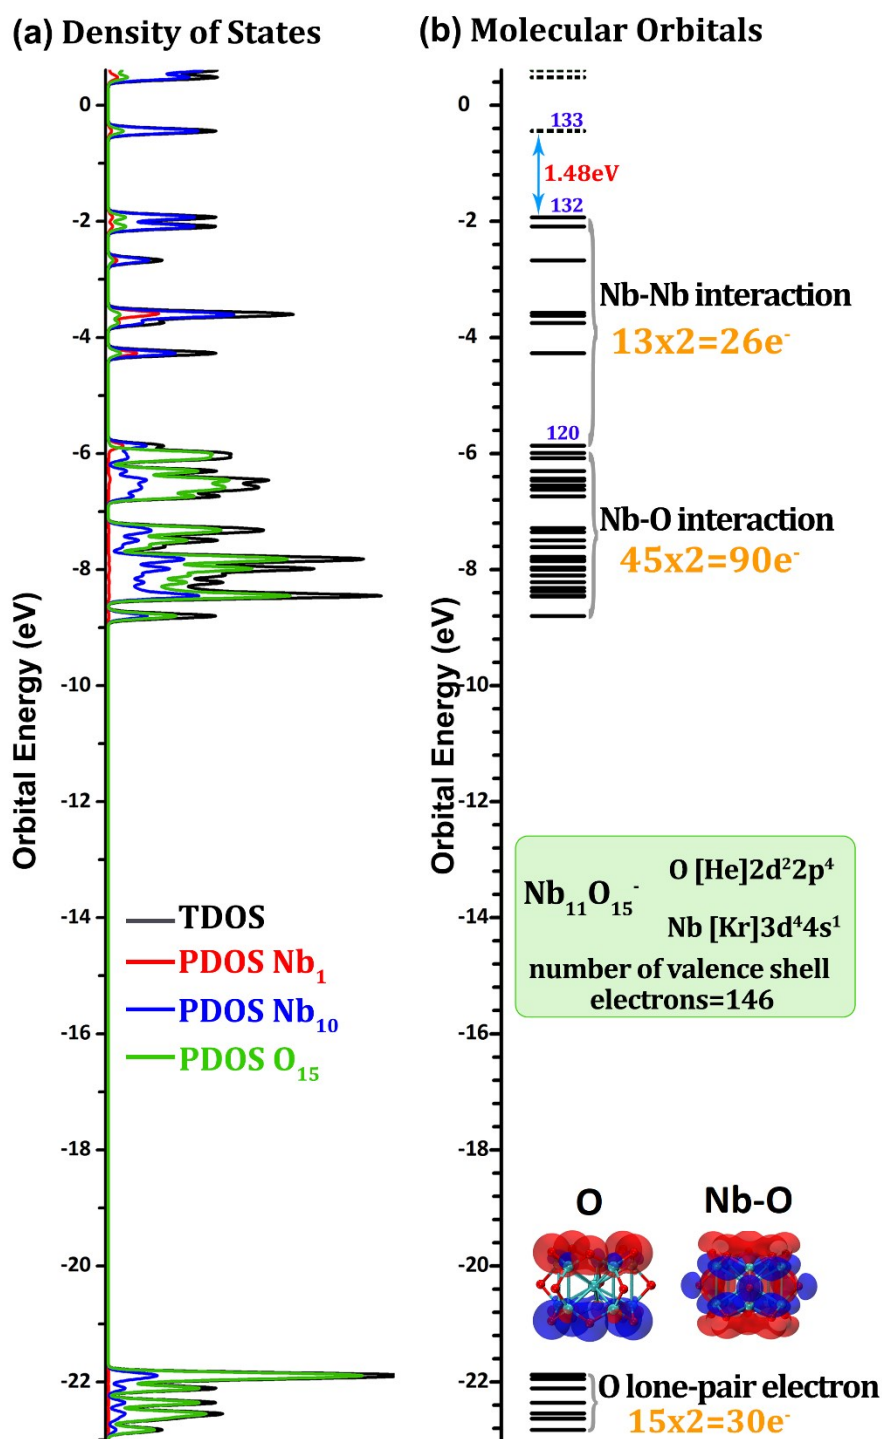

**Fig. S9** Total and partial density of states (DOS) of the  $Nb_{11}O_{15}^-$  cluster by dividing the total DOS of the cluster into contributions of  $Nb_1$  (in red),  $Nb_{10}$  (in blue), and  $O_{15}$  (in green). (b) Frontier canonical molecular orbitals (CMOs) of  $Nb_{11}O_{15}^-$ , with their superatomic features (including MOs from 120 to 132) (S, P, D and F) indicated.

## S8. Energy decomposition analysis

**Table S6** Energy decomposition analysis (EDA)<sup>9</sup> results for  $\text{Nb}_{11}\text{O}_{15}^-$  at different theoretical level taking  $\text{Nb}_{10}\text{O}_{15}$  and  $\text{Nb}^-$  as interacting fragments. Energy values are given in kcal/mol.

| Theoretical Level | Total Bonding Energy $\Delta E_{\text{tot}}$ | Electrostatic Interaction $\Delta E_{\text{elstat}}$ | Pauli Repulsion $\Delta E_{\text{pauli}}$ | Orbital Interactions $\Delta E_{\text{orb}}$ |
|-------------------|----------------------------------------------|------------------------------------------------------|-------------------------------------------|----------------------------------------------|
| B3LYP/TZP         | -451.12                                      | -1180.70                                             | 1537.94                                   | <b>-808.35</b>                               |
| PBE0/TZP          | -509.20                                      | -1218.00                                             | 1545.93                                   | <b>-837.12</b>                               |
| PBE/TZP           | -419.78                                      | -1167.82                                             | 1473.11                                   | <b>-725.06</b>                               |
| BP86/TZP          | -409.21                                      | -1149.68                                             | 1465.59                                   | <b>-725.10</b>                               |

$\Delta E_{\text{tot}} = \Delta E_{\text{pauli}} + \Delta E_{\text{elstat}} + \Delta E_{\text{orb}}$

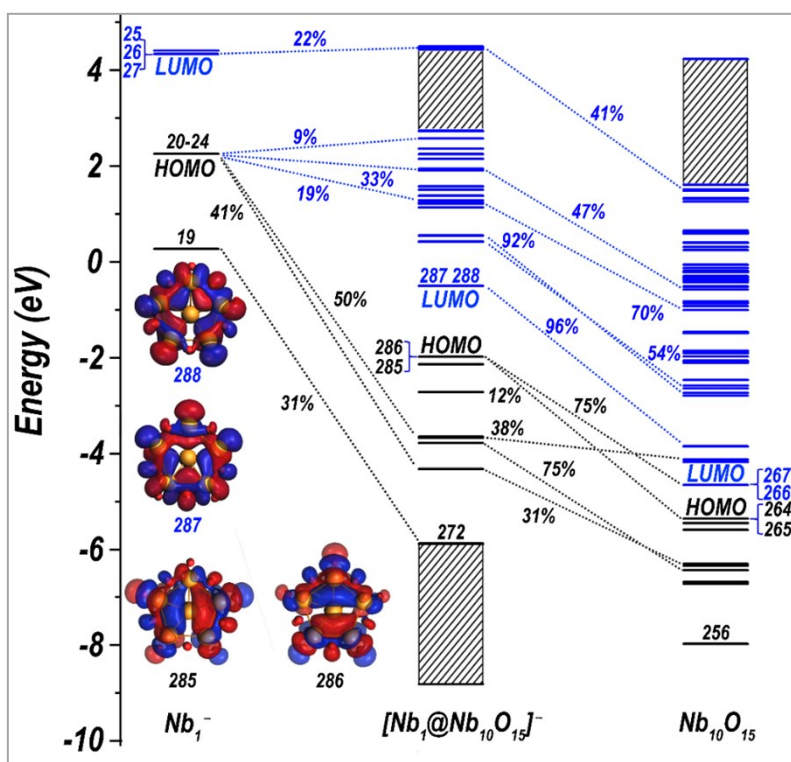

**Fig. S10** Kohn-Sham energy-level correlation diagram of  $[\text{Nb}@\text{Nb}_{10}\text{O}_{15}]^-$  cluster at the SR-ZORA B3LYP/TZP level of theory. The occupied and virtual orbitals are marked in black and blue, respectively.

## References

1. B. Yin, Q. Du, L. Geng, H. Zhang, Z. Luo, S. Zhou and J. Zhao, *J. Phys. Chem. Lett.*, 2020, **11**, 5807-5814.
2. B. Yin, Q. Du, L. Geng, H. Zhang, Z. Luo, S. Zhou and J. Zhao, *CCS Chemistry*, 2021, **3**, 1–13.
3. H. Zhang, H. Wu, L. Geng, Y. Jia, M. Yang and Z. Luo, *Phys. Chem. Chem. Phys.*, 2019, **21**, 11234-11241.
4. H. Zhang, H. Wu, Y. Jia, B. Yin, L. Geng, Z. Luo and K. Hansen, *Commun. Chem.*, 2020, **3**, 148.
5. B. Q. Yin, Q. Y. Du, L. J. Geng, H. Y. Zhang, Z. X. Luo, S. Zhou and J. J. Zhao, *J. Phys. Chem. Lett.*, 2020, **11**, 5807-5814.
6. H. Y. Zhang, H. M. Wu, L. J. Geng, Y. H. Jia, M. Z. Yang and Z. X. Luo, *Phys. Chem. Chem. Phys.*, 2019, **21**, 11234-11241.
7. H. Y. Zhang, H. M. Wu, Y. H. Jia, L. J. Geng, Z. X. Luo, H. B. Fu and J. N. Yao, *Rev. Sci. Instrum.*, 2019, **90**, 073101.
8. H. Kietzmann, J. Morenzin, P. S. Bechthold, G. Gantefor and W. Eberhardt, *J. Chem. Phys.*, 1998, **109**, 2275-2278.
9. M. v. Hopfgarten and G. Frenking, *WIREs Comput. Mol. Sci.*, 2012, **2**, 43-62.

## Appendix

### The coordinates of all the optimized niobium oxides in this study

NbO-

| Center Number | Atomic Number | Atomic Type | Coordinates (Angstroms) |          |           |
|---------------|---------------|-------------|-------------------------|----------|-----------|
|               |               |             | X                       | Y        | Z         |
| 1             | 8             | 0           | 0.000000                | 0.000000 | -1.434438 |
| 2             | 41            | 0           | 0.000000                | 0.000000 | 0.279890  |

NbO2-

| Center Number | Atomic Number | Atomic Type | Coordinates (Angstroms) |           |           |
|---------------|---------------|-------------|-------------------------|-----------|-----------|
|               |               |             | X                       | Y         | Z         |
| 1             | 8             | 0           | 0.000000                | 1.387342  | -0.750092 |
| 2             | 8             | 0           | 0.000000                | -1.387342 | -0.750092 |
| 3             | 41            | 0           | 0.000000                | 0.000000  | 0.292719  |

NbO3-

| Center Number | Atomic Number | Atomic Type | Coordinates (Angstroms) |           |           |
|---------------|---------------|-------------|-------------------------|-----------|-----------|
|               |               |             | X                       | Y         | Z         |
| 1             | 8             | 0           | -1.642685               | -0.790160 | 0.000604  |
| 2             | 8             | 0           | 1.482720                | -0.313648 | 0.735151  |
| 3             | 8             | 0           | 1.482582                | -0.314864 | -0.734729 |
| 4             | 41            | 0           | -0.258072               | 0.276814  | -0.000200 |

Nb2O-

| Center Number | Atomic Number | Atomic Type | Coordinates (Angstroms) |           |          |
|---------------|---------------|-------------|-------------------------|-----------|----------|
|               |               |             | X                       | Y         | Z        |
| 1             | 41            | 0           | -0.296973               | 1.009071  | 0.000000 |
| 2             | 41            | 0           | 0.000000                | -1.051800 | 0.000000 |
| 3             | 8             | 0           | 1.521988                | 0.218983  | 0.000000 |

Nb2O2-

| Center Number | Atomic Number | Atomic Type | Coordinates (Angstroms) |           |          |
|---------------|---------------|-------------|-------------------------|-----------|----------|
|               |               |             | X                       | Y         | Z        |
| 1             | 8             | 0           | -0.001266               | -1.647231 | 0.000000 |
| 2             | 8             | 0           | 0.001262                | 1.647230  | 0.000000 |
| 3             | 41            | 0           | 1.092418                | -0.000372 | 0.000000 |
| 4             | 41            | 0           | -1.092418               | 0.000372  | 0.000000 |

Nb2O3-

| Center Number | Atomic Number | Atomic Type | Coordinates (Angstroms) |           |           |
|---------------|---------------|-------------|-------------------------|-----------|-----------|
|               |               |             | X                       | Y         | Z         |
| 1             | 8             | 0           | 0.391527                | -1.327603 | -0.000422 |
| 2             | 8             | 0           | 0.391495                | 1.327606  | -0.000422 |
| 3             | 8             | 0           | -2.989036               | 0.000019  | 0.001382  |
| 4             | 41            | 0           | 1.665764                | 0.000005  | 0.000255  |
| 5             | 41            | 0           | -1.235322               | -0.000009 | -0.000360 |



## Nb2O5-

| Center<br>Number | Atomic<br>Number | Atomic<br>Type | Coordinates (Angstroms) |           |           |
|------------------|------------------|----------------|-------------------------|-----------|-----------|
|                  |                  |                | X                       | Y         | Z         |
| 1                | 41               | 0              | 0.076286                | 1.336874  | 0.000000  |
| 2                | 41               | 0              | 0.088917                | -1.603449 | 0.000000  |
| 3                | 8                | 0              | 0.088917                | -0.249305 | 1.315106  |
| 4                | 8                | 0              | 0.088917                | -0.249305 | -1.315106 |
| 5                | 8                | 0              | 1.523448                | 2.328465  | 0.000000  |
| 6                | 8                | 0              | -1.364621               | 2.335291  | 0.000000  |
| 7                | 8                | 0              | -1.183322               | -2.798948 | 0.000000  |

## Nb2O6-

| Center<br>Number | Atomic<br>Number | Atomic<br>Type | Coordinates (Angstroms) |           |           |
|------------------|------------------|----------------|-------------------------|-----------|-----------|
|                  |                  |                | X                       | Y         | Z         |
| 1                | 41               | 0              | -0.697351               | 1.273863  | 0.000000  |
| 2                | 41               | 0              | 0.709111                | -1.332367 | 0.000000  |
| 3                | 8                | 0              | -2.440643               | 1.530686  | 0.000000  |
| 4                | 8                | 0              | 2.455792                | -1.483550 | 0.000000  |
| 5                | 8                | 0              | -0.057713               | -2.908282 | 0.000000  |
| 6                | 8                | 0              | -0.057713               | 0.062083  | 1.301775  |
| 7                | 8                | 0              | 0.097721                | 3.036816  | 0.000000  |
| 8                | 8                | 0              | -0.057713               | 0.062083  | -1.301775 |

## Nb2O7-

| Center<br>Number | Atomic<br>Number | Atomic<br>Type | Coordinates (Angstroms) |           |           |
|------------------|------------------|----------------|-------------------------|-----------|-----------|
|                  |                  |                | X                       | Y         | Z         |
| 1                | 41               | 0              | 0.801404                | 1.036252  | 0.000000  |
| 2                | 41               | 0              | -0.811463               | -1.453840 | 0.000000  |
| 3                | 8                | 0              | 2.534833                | 1.030556  | 0.000000  |
| 4                | 8                | 0              | 0.067223                | -0.131737 | 1.293674  |
| 5                | 8                | 0              | 0.067223                | -0.131737 | -1.293674 |
| 6                | 8                | 0              | -0.186333               | -3.091991 | 0.000000  |
| 7                | 8                | 0              | 0.067223                | 2.957928  | 0.665087  |
| 8                | 8                | 0              | 0.067223                | 2.957928  | -0.665087 |
| 9                | 8                | 0              | -2.565844               | -1.450807 | 0.000000  |

## Nb3O-

| Center<br>Number | Atomic<br>Number | Atomic<br>Type | Coordinates (Angstroms) |           |           |
|------------------|------------------|----------------|-------------------------|-----------|-----------|
|                  |                  |                | X                       | Y         | Z         |
| 1                | 41               | 0              | -1.290608               | -0.626685 | 0.000103  |
| 2                | 41               | 0              | 1.448752                | -0.324927 | 0.000097  |
| 3                | 41               | 0              | -0.200548               | 1.303926  | -0.000085 |
| 4                | 8                | 0              | 0.217324                | -1.805608 | -0.000587 |

## Nb3O2-

| Center<br>Number | Atomic<br>Number | Atomic<br>Type | Coordinates (Angstroms) |           |           |
|------------------|------------------|----------------|-------------------------|-----------|-----------|
|                  |                  |                | X                       | Y         | Z         |
| 1                | 41               | 0              | 1.367036                | 0.253062  | -0.182797 |
| 2                | 41               | 0              | -1.392582               | 0.735720  | 0.090967  |
| 3                | 41               | 0              | -0.577171               | -1.289928 | -0.025236 |
| 4                | 8                | 0              | 0.233936                | 1.809984  | -0.054316 |
| 5                | 8                | 0              | 2.854992                | -0.266612 | 0.654284  |

## Nb3O3-

| Center<br>Number | Atomic<br>Number | Atomic<br>Type | Coordinates (Angstroms) |           |           |
|------------------|------------------|----------------|-------------------------|-----------|-----------|
|                  |                  |                | X                       | Y         | Z         |
| 1                | 41               | 0              | -0.842395               | 1.112192  | -0.093483 |
| 2                | 41               | 0              | 1.727993                | -0.000005 | 0.001525  |
| 3                | 41               | 0              | -0.842405               | -1.112185 | -0.093473 |
| 4                | 8                | 0              | 1.076446                | 1.775402  | 0.208043  |
| 5                | 8                | 0              | -2.374246               | 0.000000  | 0.534279  |
| 6                | 8                | 0              | 1.076433                | -1.775412 | 0.208010  |

## Nb3O4-

| Center<br>Number | Atomic<br>Number | Atomic<br>Type | Coordinates (Angstroms) |           |           |
|------------------|------------------|----------------|-------------------------|-----------|-----------|
|                  |                  |                | X                       | Y         | Z         |
| 1                | 41               | 0              | 1.006279                | -1.128297 | -0.124377 |
| 2                | 41               | 0              | -1.638743               | -0.004609 | 0.196046  |

|   |    |   |           |           |           |
|---|----|---|-----------|-----------|-----------|
| 3 | 41 | 0 | 0.992732  | 1.132169  | -0.127534 |
| 4 | 8  | 0 | -0.807790 | -1.692559 | 0.556746  |
| 5 | 8  | 0 | 2.564492  | 0.012247  | 0.282968  |
| 6 | 8  | 0 | -0.820311 | 1.685499  | 0.571159  |
| 7 | 8  | 0 | -2.782765 | -0.001410 | -1.124562 |

Nb3O5-

| Center<br>Number | Atomic<br>Number | Atomic<br>Type | Coordinates (Angstroms) |           |           |
|------------------|------------------|----------------|-------------------------|-----------|-----------|
|                  |                  |                | X                       | Y         | Z         |
| 1                | 41               | 0              | -1.542645               | -0.703268 | -0.152099 |
| 2                | 41               | 0              | 0.000089                | 1.841439  | 0.138877  |
| 3                | 41               | 0              | 1.542569                | -0.703376 | -0.152100 |
| 4                | 8                | 0              | -1.794425               | 1.246124  | -0.215132 |
| 5                | 8                | 0              | 2.440497                | -1.537876 | 1.074847  |
| 6                | 8                | 0              | -2.440624               | -1.537663 | 1.074886  |
| 7                | 8                | 0              | 1.794567                | 1.245987  | -0.215091 |
| 8                | 8                | 0              | -0.000079               | -1.644900 | -0.872239 |

Nb3O6-

| Center<br>Number | Atomic<br>Number | Atomic<br>Type | Coordinates (Angstroms) |           |           |
|------------------|------------------|----------------|-------------------------|-----------|-----------|
|                  |                  |                | X                       | Y         | Z         |
| 1                | 41               | 0              | 1.725586                | -0.465870 | -0.113112 |
| 2                | 41               | 0              | -0.459104               | 1.725923  | -0.113520 |
| 3                | 41               | 0              | -1.265626               | -1.258934 | -0.112185 |
| 4                | 8                | 0              | 2.802040                | -0.755694 | 1.212426  |
| 5                | 8                | 0              | 0.499548                | -1.884018 | -0.633041 |
| 6                | 8                | 0              | -0.746584               | 2.794229  | 1.219270  |
| 7                | 8                | 0              | 1.381334                | 1.376423  | -0.632598 |
| 8                | 8                | 0              | -1.879953               | 0.507614  | -0.641237 |
| 9                | 8                | 0              | -2.060772               | -2.044288 | 1.211617  |

Nb3O7-

| Center<br>Number | Atomic<br>Number | Atomic<br>Type | Coordinates (Angstroms) |          |           |
|------------------|------------------|----------------|-------------------------|----------|-----------|
|                  |                  |                | X                       | Y        | Z         |
| 1                | 41               | 0              | 0.233097                | 1.504977 | -0.001023 |

|    |    |   |           |           |           |
|----|----|---|-----------|-----------|-----------|
| 2  | 41 | 0 | 1.585563  | -1.073652 | -0.164159 |
| 3  | 41 | 0 | -1.662729 | -0.592878 | 0.024783  |
| 4  | 8  | 0 | 1.768026  | 0.695931  | -0.907056 |
| 5  | 8  | 0 | -1.043266 | 0.640436  | 1.334763  |
| 6  | 8  | 0 | -0.237047 | -1.886243 | -0.146828 |
| 7  | 8  | 0 | 2.637084  | -1.428531 | 1.160326  |
| 8  | 8  | 0 | -3.324359 | -1.130777 | 0.076850  |
| 9  | 8  | 0 | -1.167624 | 0.785512  | -1.242731 |
| 10 | 8  | 0 | 0.568037  | 3.151631  | 0.444221  |

Nb3O8-

| Center Number | Atomic Number | Atomic Type | Coordinates (Angstroms) |           |           |
|---------------|---------------|-------------|-------------------------|-----------|-----------|
|               |               |             | X                       | Y         | Z         |
| 1             | 41            | 0           | 1.099342                | 1.420476  | 0.000126  |
| 2             | 41            | 0           | -2.073526               | -0.000034 | 0.000049  |
| 3             | 41            | 0           | 1.098860                | -1.420652 | -0.000054 |
| 4             | 8             | 0           | -0.761695               | 1.592942  | 0.000578  |
| 5             | 8             | 0           | 1.469019                | -0.000244 | 1.295914  |
| 6             | 8             | 0           | -0.762122               | -1.593956 | 0.000318  |
| 7             | 8             | 0           | -3.089258               | 0.001434  | 1.417498  |
| 8             | 8             | 0           | 2.060954                | -2.869210 | 0.000391  |
| 9             | 8             | 0           | -3.087123               | 0.000668  | -1.418956 |
| 10            | 8             | 0           | 2.061743                | 2.869063  | -0.000306 |
| 11            | 8             | 0           | 1.469515                | 0.000381  | -1.296058 |

Nb4O10-

| Center Number | Atomic Number | Atomic Type | Coordinates (Angstroms) |           |           |
|---------------|---------------|-------------|-------------------------|-----------|-----------|
|               |               |             | X                       | Y         | Z         |
| 1             | 8             | 0           | 2.180630                | -0.044536 | -0.001851 |
| 2             | 8             | 0           | 0.044994                | 2.179647  | 0.000689  |
| 3             | 8             | 0           | -2.180700               | 0.044865  | 0.002798  |
| 4             | 8             | 0           | 0.001985                | -0.001118 | 2.067102  |
| 5             | 8             | 0           | -0.002583               | 0.001080  | -2.066992 |
| 6             | 8             | 0           | -2.227114               | -2.134860 | -2.248958 |
| 7             | 8             | 0           | -0.044580               | -2.179353 | -0.001389 |
| 8             | 8             | 0           | 2.222386                | 2.136365  | -2.252081 |
| 9             | 8             | 0           | -2.132782               | 2.224194  | 2.253595  |
| 10            | 8             | 0           | 2.137666                | -2.226343 | 2.247077  |

|    |    |   |           |           |           |
|----|----|---|-----------|-----------|-----------|
| 11 | 41 | 0 | 1.243062  | 1.194159  | -1.179321 |
| 12 | 41 | 0 | 1.195491  | -1.244397 | 1.176669  |
| 13 | 41 | 0 | -1.245765 | -1.193176 | -1.177574 |
| 14 | 41 | 0 | -1.192769 | 1.243426  | 1.180228  |

Nb5O12-

| Center<br>Number | Atomic<br>Number | Atomic<br>Type | Coordinates (Angstroms) |           |           |
|------------------|------------------|----------------|-------------------------|-----------|-----------|
|                  |                  |                | X                       | Y         | Z         |
| 1                | 8                | 0              | -0.026653               | -1.152603 | 1.509259  |
| 2                | 8                | 0              | 2.551381                | -1.060388 | -1.078434 |
| 3                | 8                | 0              | -1.077281               | 1.057376  | -1.557965 |
| 4                | 8                | 0              | -1.119400               | 1.652234  | 1.394440  |
| 5                | 8                | 0              | -0.339418               | -1.921436 | -1.304127 |
| 6                | 8                | 0              | -2.841602               | -1.137148 | -2.806446 |
| 7                | 8                | 0              | -2.673720               | -0.753785 | 0.241877  |
| 8                | 8                | 0              | 1.796644                | -3.330051 | 0.606677  |
| 9                | 8                | 0              | 1.552940                | 2.100624  | -0.229441 |
| 10               | 8                | 0              | -2.333689               | -0.450369 | 3.319355  |
| 11               | 8                | 0              | -0.778941               | 3.913450  | -0.584168 |
| 12               | 8                | 0              | 4.015675                | 0.545631  | 1.077459  |
| 13               | 41               | 0              | 2.836616                | 0.593954  | -0.178619 |
| 14               | 41               | 0              | 1.149867                | -1.846238 | 0.029174  |
| 15               | 41               | 0              | -1.606291               | -0.188950 | 1.774542  |
| 16               | 41               | 0              | -1.803582               | -0.737881 | -1.486690 |
| 17               | 41               | 0              | -0.328013               | 2.283790  | -0.253233 |

Nb5O13-

| Center<br>Number | Atomic<br>Number | Atomic<br>Type | Coordinates (Angstroms) |           |           |
|------------------|------------------|----------------|-------------------------|-----------|-----------|
|                  |                  |                | X                       | Y         | Z         |
| 1                | 8                | 0              | 0.792063                | 1.539226  | 1.512097  |
| 2                | 8                | 0              | -1.923182               | 1.576515  | -0.000123 |
| 3                | 8                | 0              | 0.792220                | -1.539210 | -1.512078 |
| 4                | 8                | 0              | 0.792032                | -1.539264 | 1.512049  |
| 5                | 8                | 0              | 0.792250                | 1.539268  | -1.512028 |
| 6                | 8                | 0              | 2.904624                | 0.000031  | -3.081236 |
| 7                | 8                | 0              | 2.899568                | -0.000015 | 0.000148  |
| 8                | 8                | 0              | -0.234100               | 3.999248  | -0.000005 |
| 9                | 8                | 0              | -1.923217               | -1.576530 | -0.000174 |

|    |    |   |           |           |           |
|----|----|---|-----------|-----------|-----------|
| 10 | 8  | 0 | 2.904227  | -0.000061 | 3.081535  |
| 11 | 8  | 0 | -0.234114 | -3.999242 | -0.000127 |
| 12 | 8  | 0 | -4.232023 | -0.000004 | 1.418557  |
| 13 | 8  | 0 | -4.232259 | 0.000041  | -1.418543 |
| 14 | 41 | 0 | -0.215964 | 2.277783  | -0.000020 |
| 15 | 41 | 0 | 1.915069  | 0.000019  | -1.672631 |
| 16 | 41 | 0 | -0.215989 | -2.277777 | -0.000089 |
| 17 | 41 | 0 | -3.221985 | 0.000007  | -0.000077 |
| 18 | 41 | 0 | 1.914852  | -0.000032 | 1.672803  |

Nb11O15-

| Center<br>Number | Atomic<br>Number | Atomic<br>Type | Coordinates (Angstroms) |           |           |
|------------------|------------------|----------------|-------------------------|-----------|-----------|
|                  |                  |                | X                       | Y         | Z         |
| 1                | 41               | 0              | -2.437424               | 0.791967  | 1.406213  |
| 2                | 41               | 0              | 0.000000                | 2.562860  | 1.406213  |
| 3                | 41               | 0              | -1.506411               | -2.073397 | 1.406213  |
| 4                | 41               | 0              | 2.437424                | 0.791967  | 1.406213  |
| 5                | 41               | 0              | 0.000000                | 0.000000  | 0.000000  |
| 6                | 41               | 0              | 1.506411                | -2.073397 | -1.406213 |
| 7                | 41               | 0              | 0.000000                | 2.562860  | -1.406213 |
| 8                | 41               | 0              | 2.437424                | 0.791967  | -1.406213 |
| 9                | 41               | 0              | -1.506411               | -2.073397 | -1.406213 |
| 10               | 41               | 0              | -2.437424               | 0.791967  | -1.406213 |
| 11               | 41               | 0              | 1.506411                | -2.073397 | 1.406213  |
| 12               | 8                | 0              | 0.000000                | 3.893376  | 0.000000  |
| 13               | 8                | 0              | -3.702820               | 1.203119  | 0.000000  |
| 14               | 8                | 0              | -1.696165               | 2.334571  | 2.300530  |
| 15               | 8                | 0              | -2.744452               | -0.891727 | 2.300530  |
| 16               | 8                | 0              | 1.696165                | 2.334571  | 2.300530  |
| 17               | 8                | 0              | 2.744452                | -0.891727 | 2.300530  |
| 18               | 8                | 0              | 3.702820                | 1.203119  | 0.000000  |
| 19               | 8                | 0              | 0.000000                | -2.885688 | 2.300530  |
| 20               | 8                | 0              | 2.744452                | -0.891727 | -2.300530 |
| 21               | 8                | 0              | -2.288469               | -3.149807 | 0.000000  |
| 22               | 8                | 0              | 1.696165                | 2.334571  | -2.300530 |
| 23               | 8                | 0              | -2.744452               | -0.891727 | -2.300530 |
| 24               | 8                | 0              | 2.288469                | -3.149807 | 0.000000  |
| 25               | 8                | 0              | -1.696165               | 2.334571  | -2.300530 |
| 26               | 8                | 0              | 0.000000                | -2.885688 | -2.300530 |
